# Supplementary material for: A Simple Method for Extraction of Ricinus Communis L Oil and its Application for Biodiesel Production by Ethylic Route
Source: Research Square preprint supplement (doi:10.21203/rs.3.rs-131299/v1), 2020-12-22
Supplement: Supplementary file 1 [file 1630b3c29815ed450fd83aca.docx]

| Tested substances | Flame intensity | Flame / time extension | Smoke release |
| --- | --- | --- | --- |
| *Ricinus communis L* oil (OR) | Lower | lower | Imperceptible |
| Petroleum diesel (DP) | Very intense | lower | Much smoke |
| *Ricinus communis L* biodiesel (BR) | Intense and controlled | immense | low smoke |
| Mixture of *Ricinus communis L* biodiesel and petroleum diesel (B20) | Intense | immense | A lot of smoke, however, less than DP |
