# Supplementary material for: A Simple Method for Extraction of Ricinus Communis L Oil and its Application for Biodiesel Production by Ethylic Route
Source: Research Square preprint supplement (doi:10.21203/rs.3.rs-131299/v1), 2020-12-22
Supplement: Supplementary file 4 [file 219d0b75253669a73608f831.docx]

| Biodiesel | Method /Percentage of oil extracted | Yield | References |
| --- | --- | --- | --- |
| biodiesel from Ricinus communis oil (castor seed oil) | 48% by soxhlet apparatus | 90 % | [19] |
| 43.6% by soxhlet apparatus | (94%) | [18] |
| 51.7% by Soxhlet extraction method | 61.44 % | [20] |
| 14% A simple method for extraction by solvent extraction. | 37 % | This work |
