# Supplementary material for: A Simple Method for Extraction of Ricinus Communis L Oil and its Application for Biodiesel Production by Ethylic Route
Source: Research Square preprint supplement (doi:10.21203/rs.3.rs-131299/v1), 2020-12-22
Supplement: Supplementary file 5 [file 3ed1108819074fb6da8c1b70.docx]

| Sample | Value obtained | Maximum value established by the standards |
| --- | --- | --- |
| Acid Value of *Ricinus communis L* oil | 1,98 mgNaOH/g | 0,8 mg Base/g – ANP 045/2014 (Brazil) |
| 0,5 mg Base/g - EN 14214 (Europe) |
| 0,5mg Base/g ASTM- D 6751 (EUA) |
